# Supplementary material for: Design of hybrid conjugates based on chemical similarity
Source: Royal Society of Chemistry journal article supplement (doi:10.1039/c3ra42191k), 2013-01-01
Supplement: c3ra42191k.pdf [file c3ra42191k.pdf]

# Supplementary Information

## Design of Hybrid Conjugates Based on Chemical Similarity

Georgina Fabregat,<sup>1,2</sup> Gema Ballano,<sup>3</sup> Jordi Casanovas,<sup>4</sup> Adèle D. Laurent,<sup>5</sup> Elaine Armelin,<sup>1,2</sup>

Luis J. del Valle,<sup>1</sup> Carlos Cativiela,<sup>3,\*</sup> Denis Jacquemin,<sup>5,6,\*</sup> and Carlos Alemán<sup>1,2,\*</sup>

<sup>1</sup> *Departament d'Enginyeria Química, ETSEIB, Universitat Politècnica de Catalunya, Av. Diagonal 647, 08028, Barcelona, Spain*

<sup>2</sup> *Center for Research in Nano-Engineering, Universitat Politècnica de Catalunya, Campus Sud, Edifici C', C/Pasqual i Vila s/n, Barcelona E-08028, Spain*

<sup>3</sup> *Department of Organic Chemistry, ISQCH, University of Zaragoza–CSIC, 50009 Zaragoza, Spain*

<sup>4</sup> *Departament de Química, Escola Politècnica Superior, Universitat de Lleida, c/ Jaume II n° 69, Lleida E-25001, Spain*

<sup>5</sup> *CEISAM, UMR CNRS 6230, Faculté des Sciences et des Techniques, BP 92208, Université de Nantes, 2, rue de la Houssinière, 44322 Nantes Cedex, France.*

<sup>6</sup> *Institut Universitaire de France, 103 bd St Michel, 75005 Paris Cedex 5, France.*

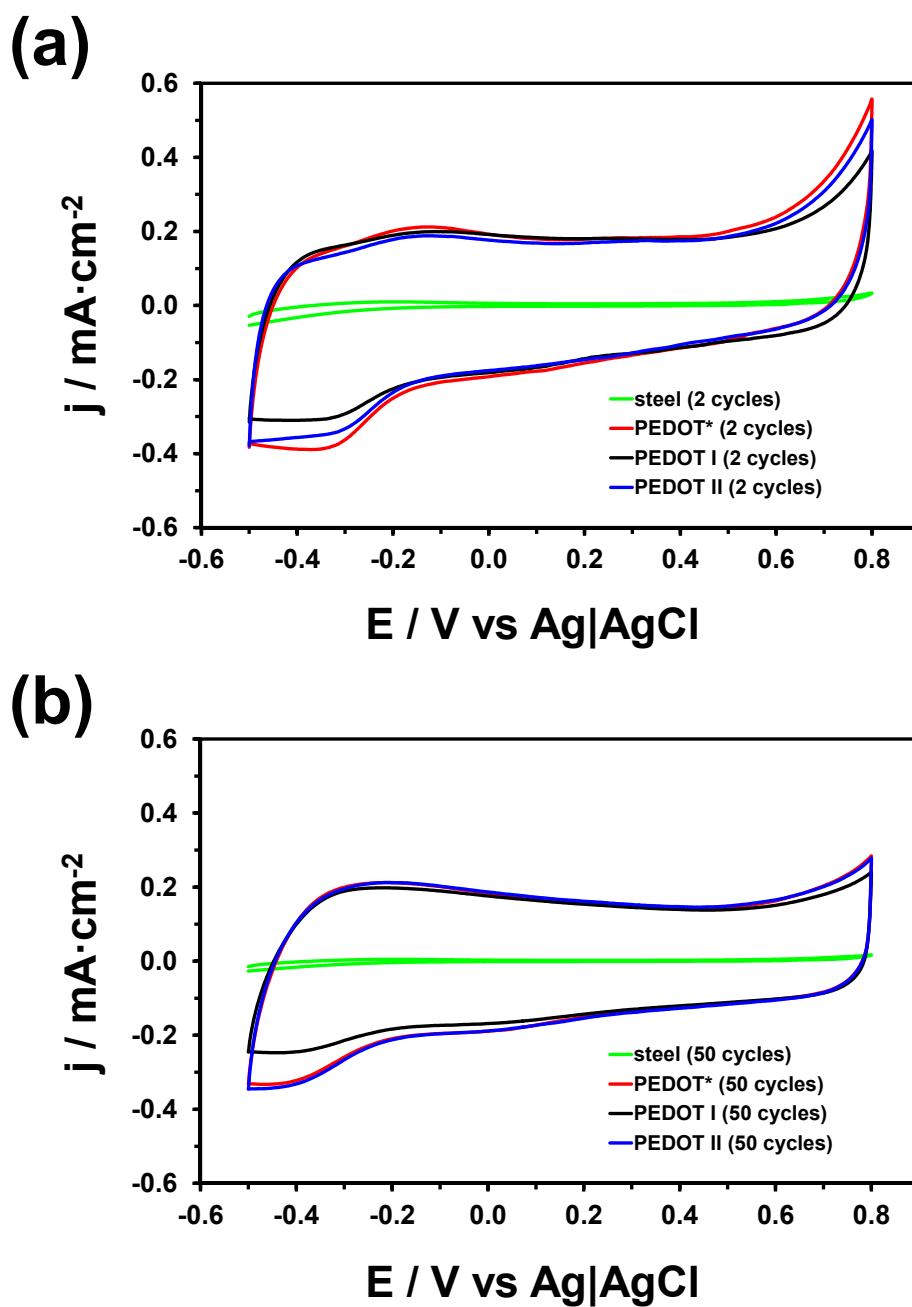

**Figure S1.** (a) Control voltammograms for PEDOT\*, PEDOT-I and PEDOT-II after (a) 2 and (b) 50 consecutive oxidation-reduction cycles. Voltammograms were recorded in a 0.1 M PBS solution at 25 mV/s and 25°C. Initial and final potentials: -0.50 V; reversal potential: +0.80 V. The reduction peak at -0.4 V has been attributed to the reduction of oxygen.

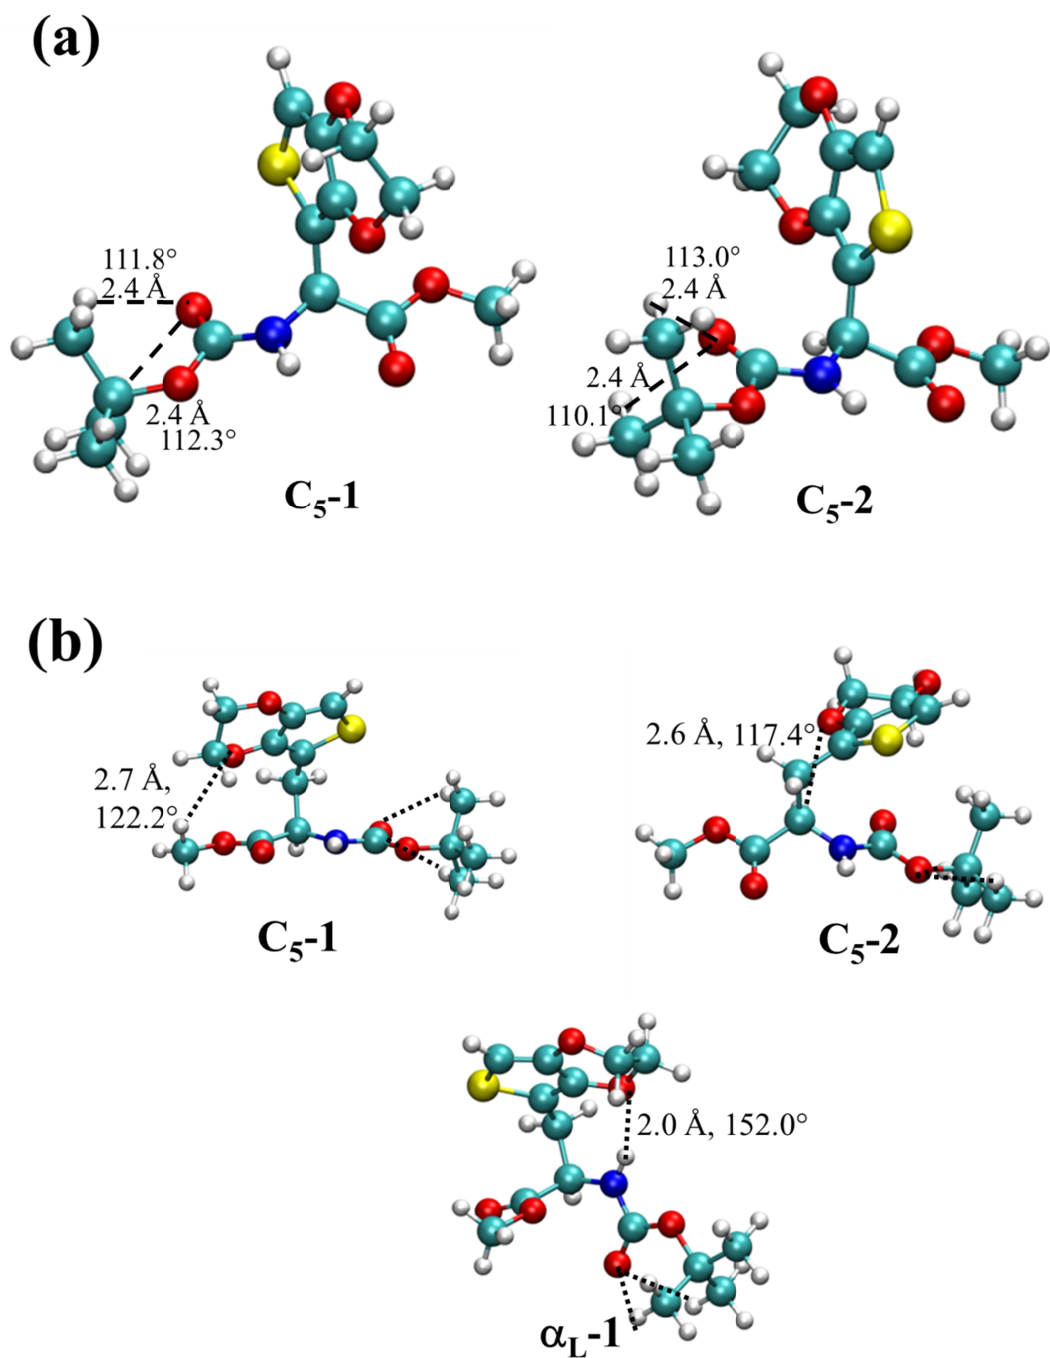

**Figure S2.** Minimum energy conformations of representative minima of (a) **II** and (b) **I** calculated at the  $\omega$ B97X-D/6-311++G(d,p) level. The intramolecular interactions are indicated by dashed lines. Geometric parameters associated to these interactions (*i.e.* H $\cdots$ O distance and  $\angle$ N/C–H $\cdots$ O angle in hydrogen are indicated.

(a)

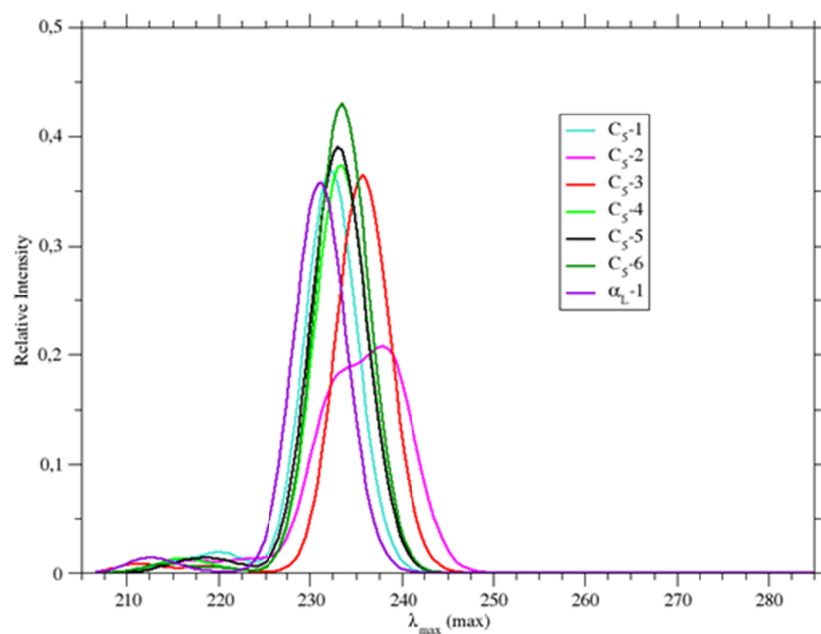

(b)

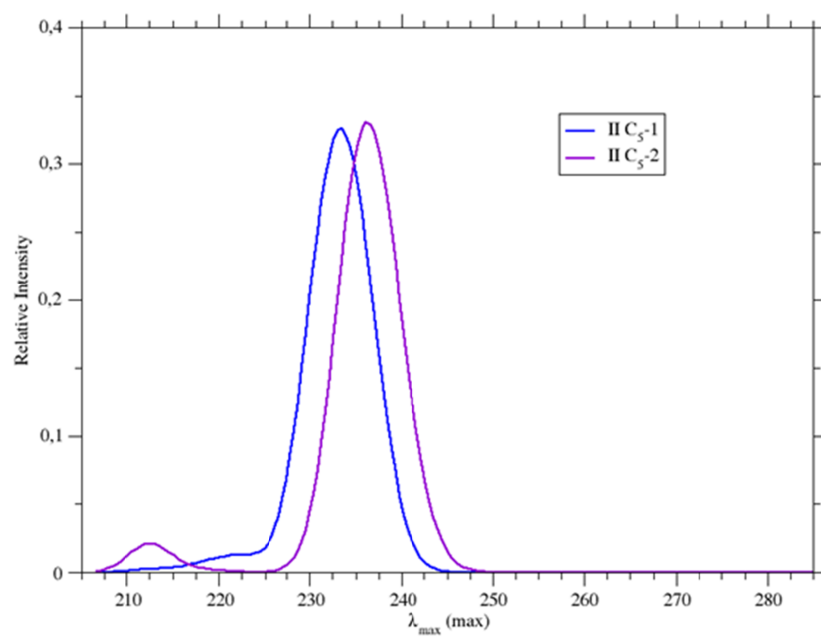

**Figure S3.** Electronic spectra calculated for the more stable conformations (*i.e.*  $\Delta G < 1.5$  kcal/mol; see Tables 5 and 6) of **I** (a) and **II** (b).



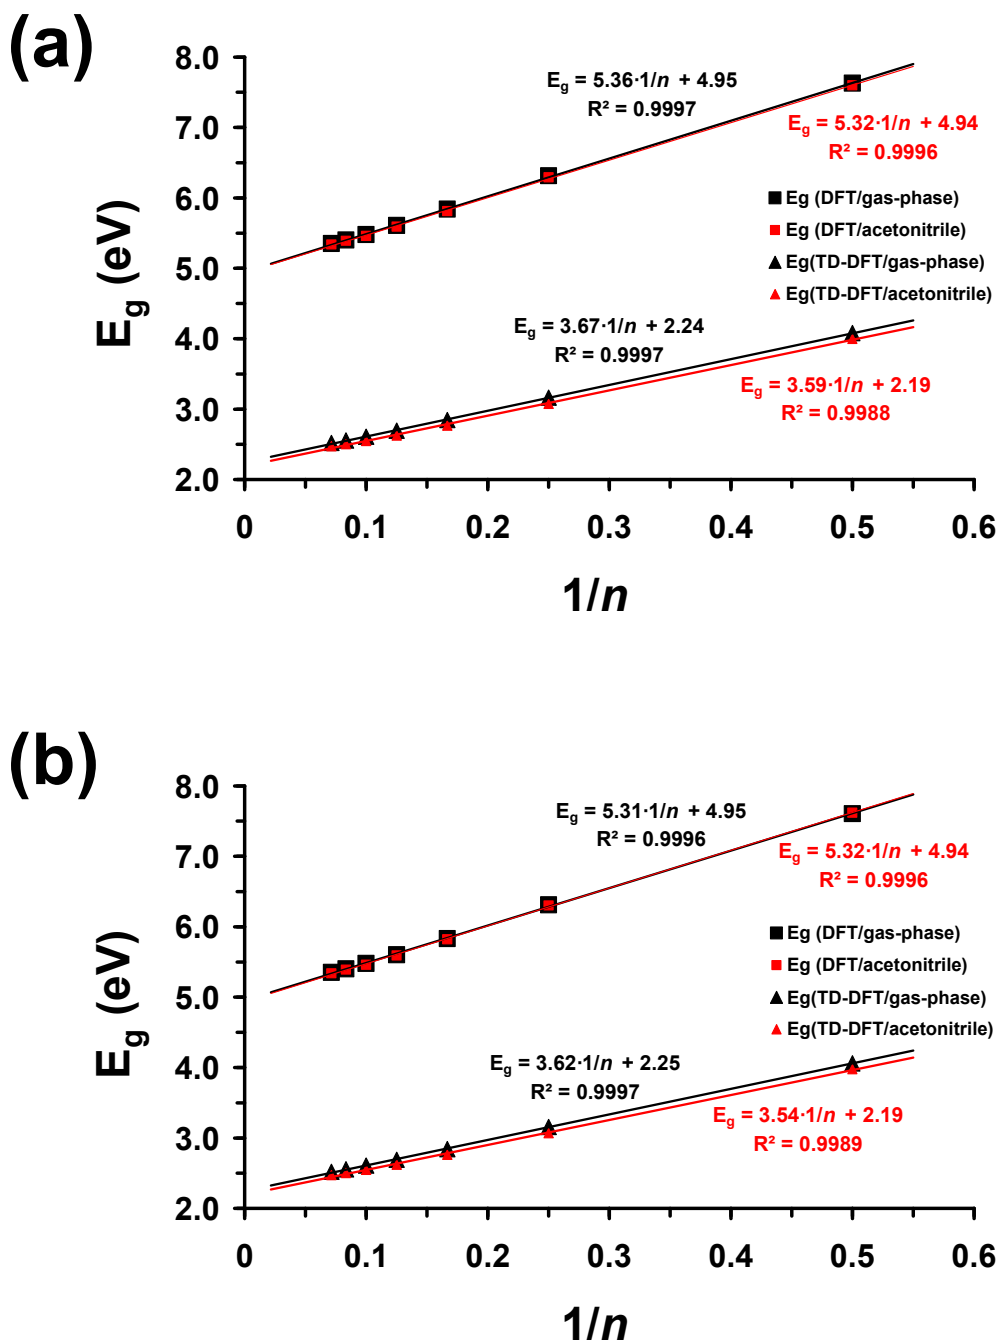

**Figure S4.** Variation of the  $E_g$  derived from both DFT and TD-DFT calculations in the gas-phase (black) and acetonitrile solution (red) against  $1/n$ , where  $n$  is the number of EDOT units, in (a) (EDOT)<sub>n</sub>-I and (b) (EDOT)<sub>n</sub>-II. The solid lines correspond to the linear regressions used to extrapolate this electronic property towards conjugates with infinite PEDOT chains.

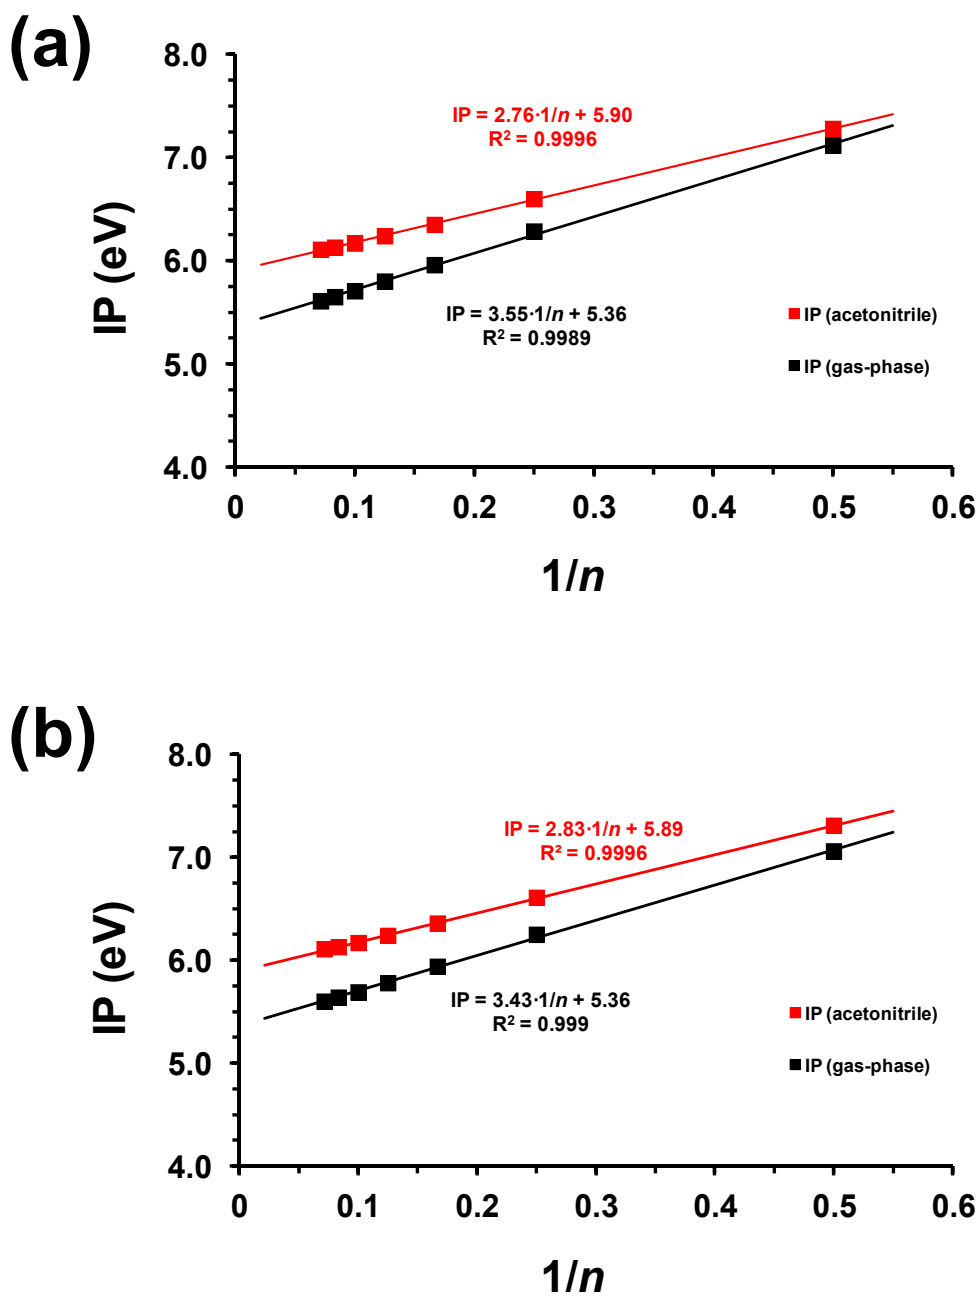

**Figure S5.** Variation of the IP derived from DFT calculations in the gas-phase (black) and acetonitrile solution (red) against  $1/n$ , where  $n$  is the number of EDOT units, in (a)  $(EDOT)_n$ -I and (b)  $(EDOT)_n$ -II. The solid lines correspond to the linear regressions used to extrapolate this electronic property towards conjugates with infinite PEDOT chains.
